# Supplementary material for: Genomic and phenotypic characterization of a refactored xylose-utilizing Saccharomyces cerevisiae strain for lignocellulosic biofuel production
Source: PubMed Central journal article supplement (PMC6162923; doi:10.1186/s13068-018-1269-7), 2018-09-29

### (A) XI-based pathway

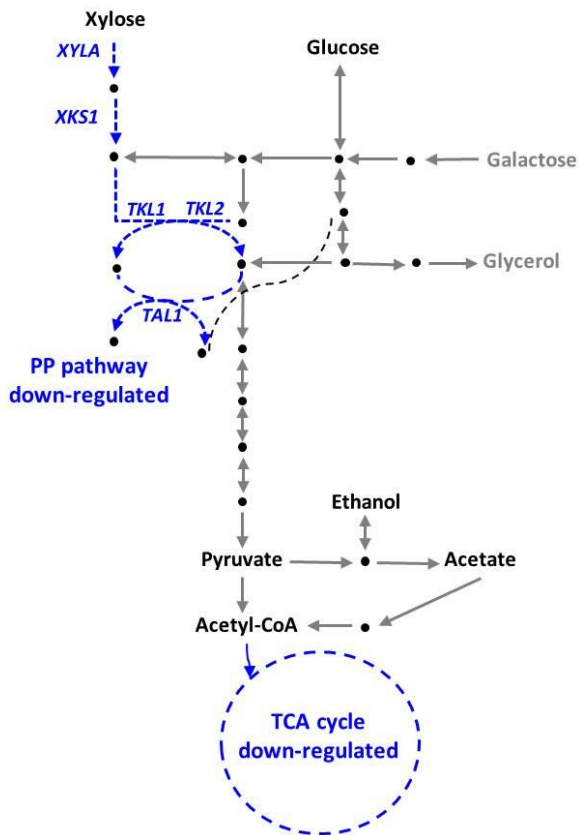

### (B) XR/XDH-based pathway

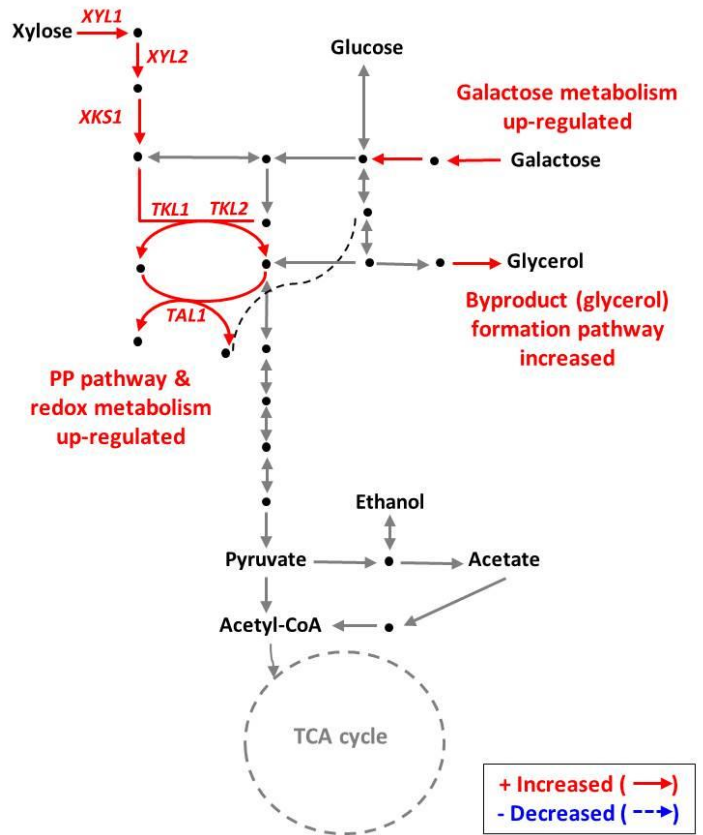

Supplement: 13068_2018_1269_MOESM4_ESM.pdf [file 13068_2018_1269_MOESM4_ESM.pdf]
